# Supplementary material
Source: PubMed Central journal article supplement (PMC4837106)
Supplement: NIHMS755120-supplement-2.pdf [file NIHMS755120-supplement-2.pdf]

|                      |               |            |               |
|----------------------|---------------|------------|---------------|
| anti-B220            | 1:200         | 48-0452-82 | eBioscience   |
| anti-B220            | 1:200         | 553086     | BD Pharmigen  |
| anti-CD3e            | 1:200         | 48-0031-82 | eBioscience   |
| anti-CD4             | 1:200         | 83-0042-42 | eBioscience   |
| anti-CD4             | 1:200         | BE0003-1   | BioXCell      |
| anti-CD8a            | 1:200         | BE0004-1   | BioXCell      |
| anti-CD8a            | 1:200         | 56-0081-82 | eBioscience   |
| anti-CD8a            | 1:200         | 553029     | BD Pharmigen  |
| anti-CD8a            | 1:200         | 100744     | Biolegend     |
| anti-CD11b           | 1:200         | 47-0112-82 | eBioscience   |
| anti-CD11b           | 1:200         | BE007      | BioXCell      |
| anti-CD11b           | 1:200         | 553309     | BD Pharmigen  |
| anti-CD11b           | 1:200         | 101236     | Biolegend     |
| anti-CD25            | 1:200         | 17-0251-82 | eBioscience   |
| anti-CD25            | 1:200         | 553070     | BD Pharmigen  |
| anti-CD11c           | 1:200         | 25-0114-82 | eBioscience   |
| anti-CD11c           | 1:200         | 17-0114-82 | eBioscience   |
| anti-CD11c           | 1:200         | 56-0114-82 | eBioscience   |
| anti-CD11c           | 1:200         | 553800     | BD Pharmigen  |
| anti-CD11c           | 1:200         | 553800     | Biolegend     |
| anti-CD19            | 1:200         | BE0150     | BioXCell      |
| anti-CD44            | 1:200         | 56-0441-85 | eBioscience   |
| anti-CD45            | 1:200         | 25-0451-82 | eBioscience   |
| anti-CD45.1          | 1:200         | 25-0453-82 | eBioscience   |
| anti-CD45.2          | 1:200         | 560693     | BD Pharmigen  |
| anti-CD62L           | 1:200         | 560516     | BD Pharmigen  |
| anti-CD64            | 1:200         | 139306     | Biolegend     |
| anti-CD69            | 1:200         | 45-0691-82 | eBioscience   |
| anti-CD103           | 1:100         | 557495     | BD Pharmigen  |
| anti-CD115           | 1:200         | 46-1152-82 | eBioscience   |
| anti-Foxp3           | 1:100         | 12-5773-82 | eBioscience   |
| anti-I-A/I-E (MHCII) | 1:4000        | 6-5321-82  | eBioscience   |
| anti-I-A/I-E (MHCII) | 1:4000        | 56-5321-82 | eBioscience   |
| anti-IL4             | 1:200         | 554432     | BD Pharmigen  |
| anti-IL5             | 1:200         | 554395     | BD Pharmigen  |
| anti-IL17A           | 1:200         | 56022      | BD Pharmigen  |
| anti-IFN-g           | 1:200         | 25-7311-82 | eBioscience   |
| anti-IgE             | 1:200         | RMGE00     | Invitrogen    |
| anti-IgE             | 1 to<br>10000 | 13-5992-82 | eBioscience   |
| anti-IgG1            | 1:50000       | A90-105B   | Bethyl        |
| anti-IgG2c           | 1:25000       | A90-136B   |               |
| anti-Ly6C            | 1:200         | 560595     | BD Pharmigen  |
| anti-Ly6G            | 1:200         | 48-5931-82 | eBioscience   |
| anti-Neuropilin      | 1:200         | BAF566     | RandD Systems |
| anti-NK1.1           | 1:200         | 562921     | BD Pharmigen  |

|                     |                    |            |              |
|---------------------|--------------------|------------|--------------|
| anti-NK1.1          | 1:200              | 553163     | BD Pharmigen |
| anti-OVA IgG1       | 1:800-<br>1:100000 | 520501     | Biolegend    |
| anti-SiglecF        | 1:200              | 552126     | BD Pharmigen |
| anti-TCR $\beta$    | 1:200              | 109220     | Biolegend    |
| anti-TCR $\beta$    | 1:200              | BE00102    | BioXCell     |
| anti-TER119         | 1:200              | 553672     | Biolegend    |
| anti-Va2            | 1:200              | 48-5812-82 | eBioscience  |
| IgE isotype control | 1:256-<br>1:100000 | 554118     | BD Pharmigen |

**Supplementary Table 1. List of antibodies, dilutions used, catalogue number and vendor.**
